# Supplementary material for: Hydrazinium lanthanide oxalates: synthesis, structure and thermal reactivity of N2H5[Ln2(C2O4)4(N2H5)]·4H2O, Ln = Ce, Nd
Source: Royal Society of Chemistry journal article supplement (doi:10.1039/c3dt52944d), 2014-01-01
Supplement: c3dt52944d.pdf [file c3dt52944d.pdf]

## Supporting Information

For

# Hydrazinium lanthanide oxalates: synthesis, structure and thermal reactivity of $\text{N}_2\text{H}_5[\text{Ln}_2(\text{C}_2\text{O}_4)_4(\text{N}_2\text{H}_5)].4\text{H}_2\text{O}$ , Ln = Ce, Nd.

Lucie De Almeida<sup>a</sup>, Stéphane Grandjean<sup>a</sup>, Murielle Rivenet<sup>b</sup>, Fabrice Patisson<sup>c</sup>, Francis Abraham<sup>b,\*</sup>

<sup>a</sup> CEA, Nuclear Energy Division, Marcoule, RadioChemistry & Process Department,  
BP17171, 30207 Bagnols-sur-Cèze, France

<sup>b</sup> Univ. Lille Nord de France, Unité de Catalyse et de Chimie du Solide, UCCS, UMR CNRS  
8181, ENSCL-USTL, BP 90108, 59652 Villeneuve d'Ascq Cedex, France

<sup>c</sup> Institut Jean Lamour, CNRS – Université de Lorraine, Ecole des Mines de Nancy, Parc de  
Saurupt, 54042 Nancy Cedex, France

\* francis.abraham@ensc-lille.fr

## Contents

|                                                                                |         |
|--------------------------------------------------------------------------------|---------|
| Fig. S1: FT-IR spectra of thermal decomposition intermediates in air           | page 3  |
| Fig. S2: HT-XRD patterns in air                                                | page 4  |
| Fig. S3: XRD patterns of calcination residues at 1000°C in air                 | page 5  |
| Fig. S4: TG, DTA and evolved gases under streaming argon                       | page 6  |
| Fig. S5: FT-IR spectra of thermal decomposition intermediates under argon      | page 8  |
| Fig. S6: XRD patterns of the calcinations residues after under argon at 1000°C | page 9  |
| Table S1. Characteristics of the strongest hydrogen bonds                      | page 10 |
| Table S1. Decomposition scheme of Ce-HyOx in air.                              | page 10 |
| Table S2. Decomposition scheme of Nd-HyOx in air.                              | page 10 |
| Table S3: Decomposition scheme of the Ln-HyOx compounds in air and in argon    | page 11 |

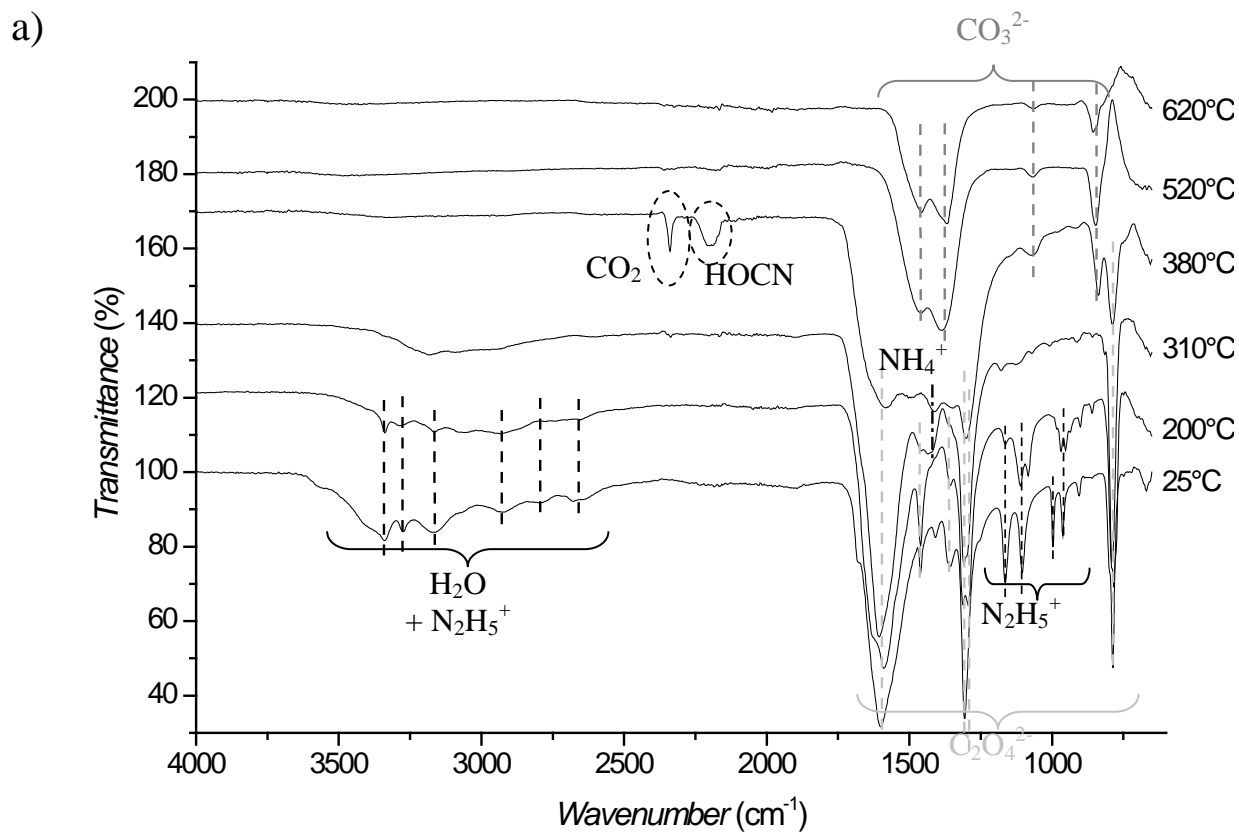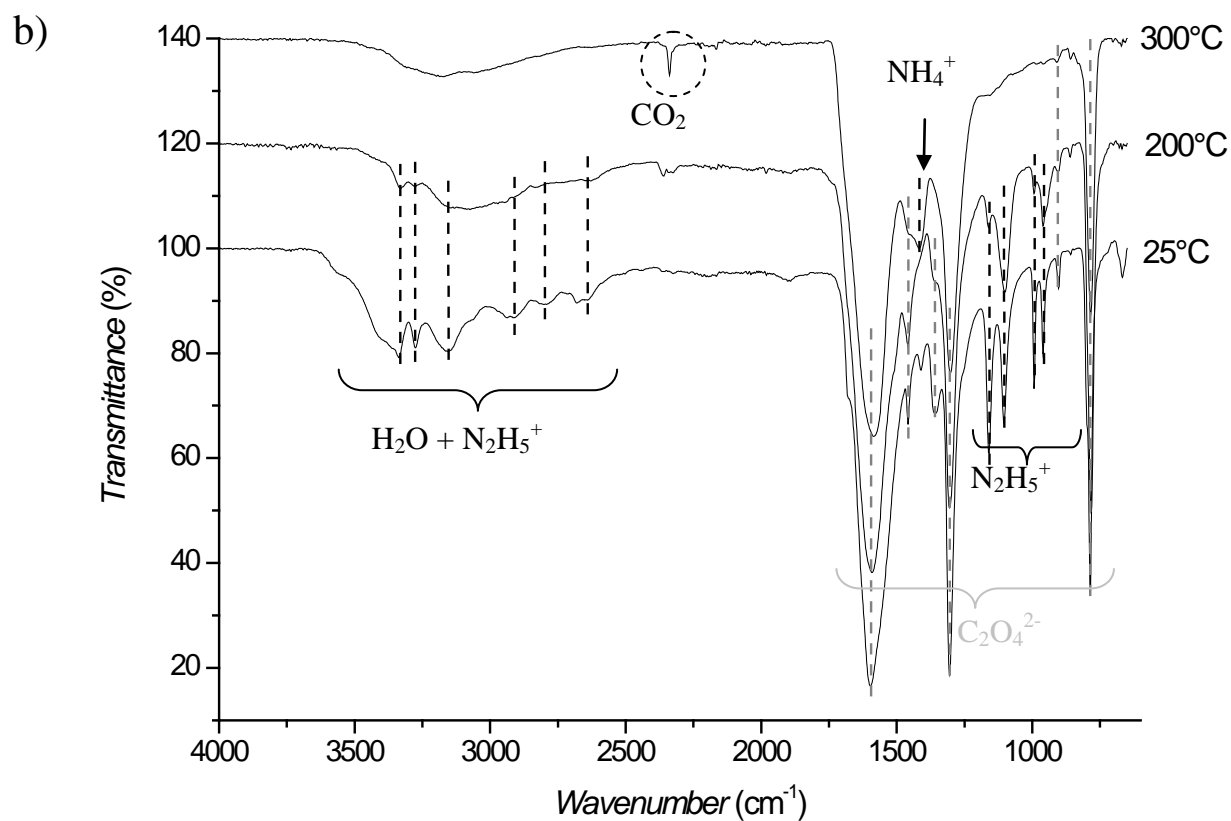

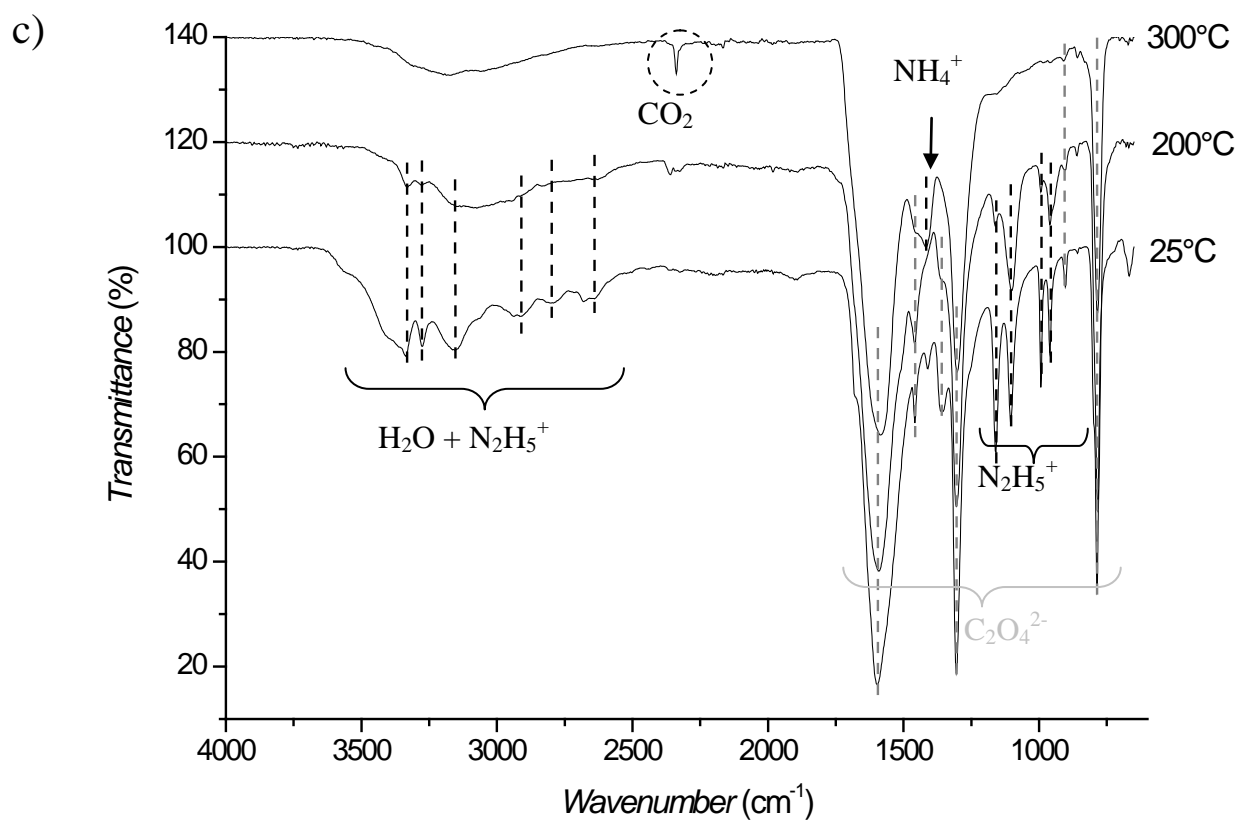

**Figure S1.** FT-IR spectra of thermal decomposition intermediates in air for the three  $\text{N}_2\text{H}_5[\text{Ln}_2(\text{C}_2\text{O}_4)_4(\text{N}_2\text{H}_5)].4\text{H}_2\text{O}$  compounds a) Ce-HyOx, b) Nd-HyOx and c) CeNd-HyOx.

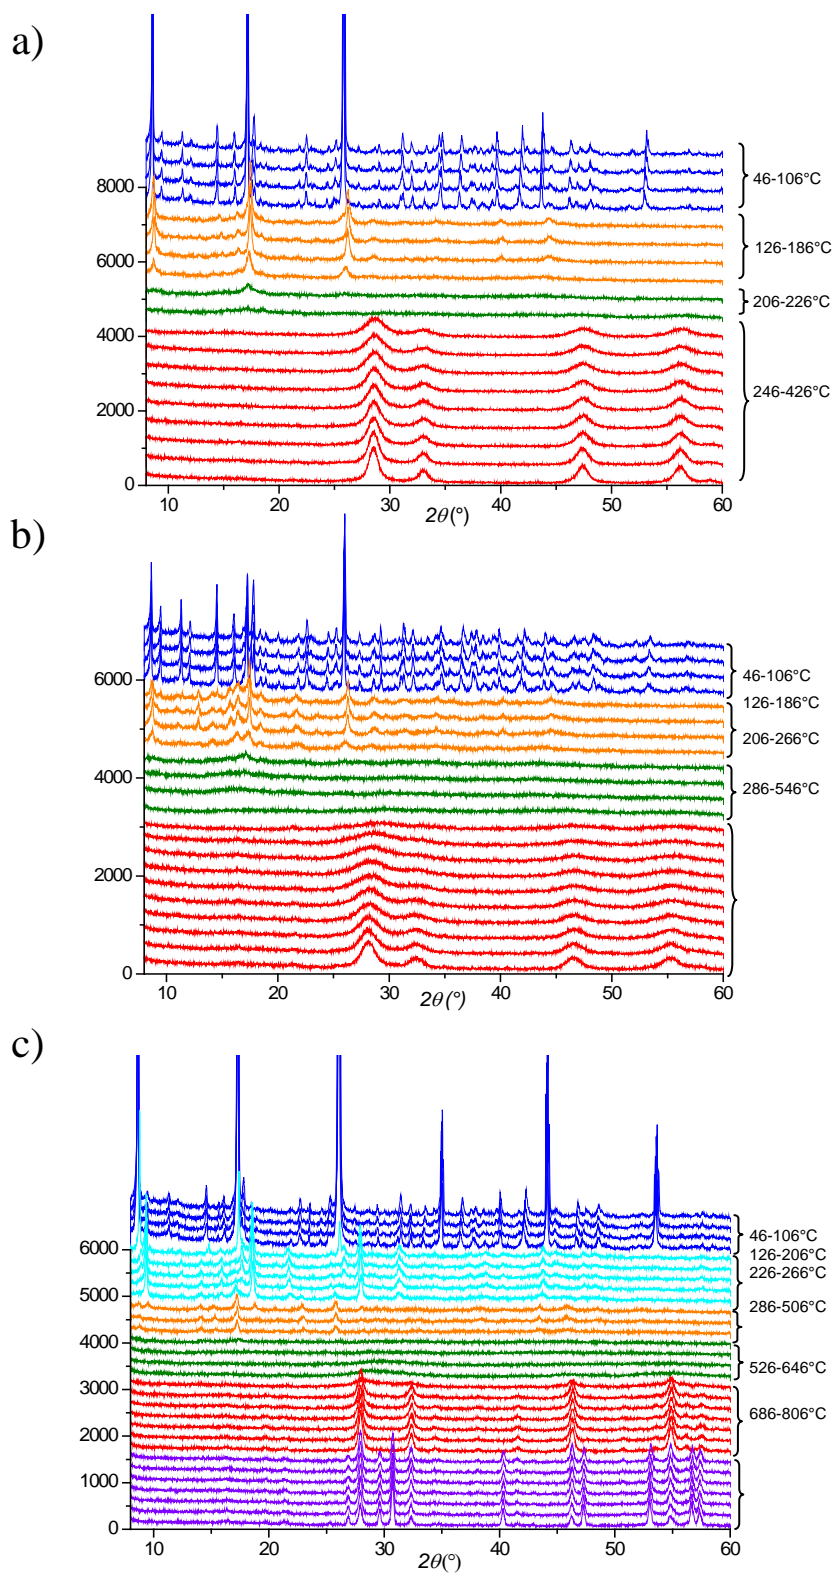

**Figure S2.** HT-XRD patterns in air of  $N_2H_5[Ln_2(C_2O_4)_4(N_2H_5)].4H_2O$  compounds a) Ce-HyOx, b) CeNd-HyOx and c) Nd-HyOx.

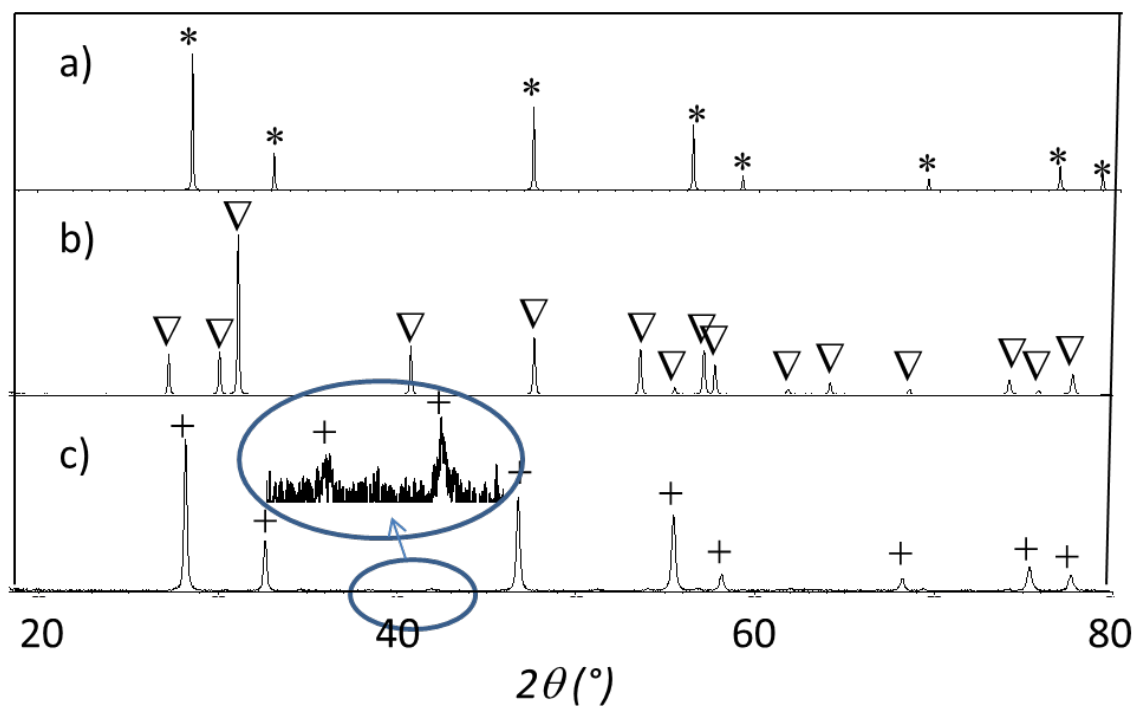

**Figure S3.** X-ray diffraction patterns of the Ce-HyOx, Nd-HyOx and CeNdHYOX calcinations residues at 1000°C showing the formation of a)  $\text{CeO}_2$  (\*, JCPDS 04-013-4361), b)  $\text{A-Nd}_2\text{O}_3$  ( $\nabla$ , JCPDS 04-015-4998) and c)  $\text{C-Ce}_{0.5}\text{Nd}_{0.5}\text{O}_{1.75}$  solid solution (+, JCPDS 04-013-6624).

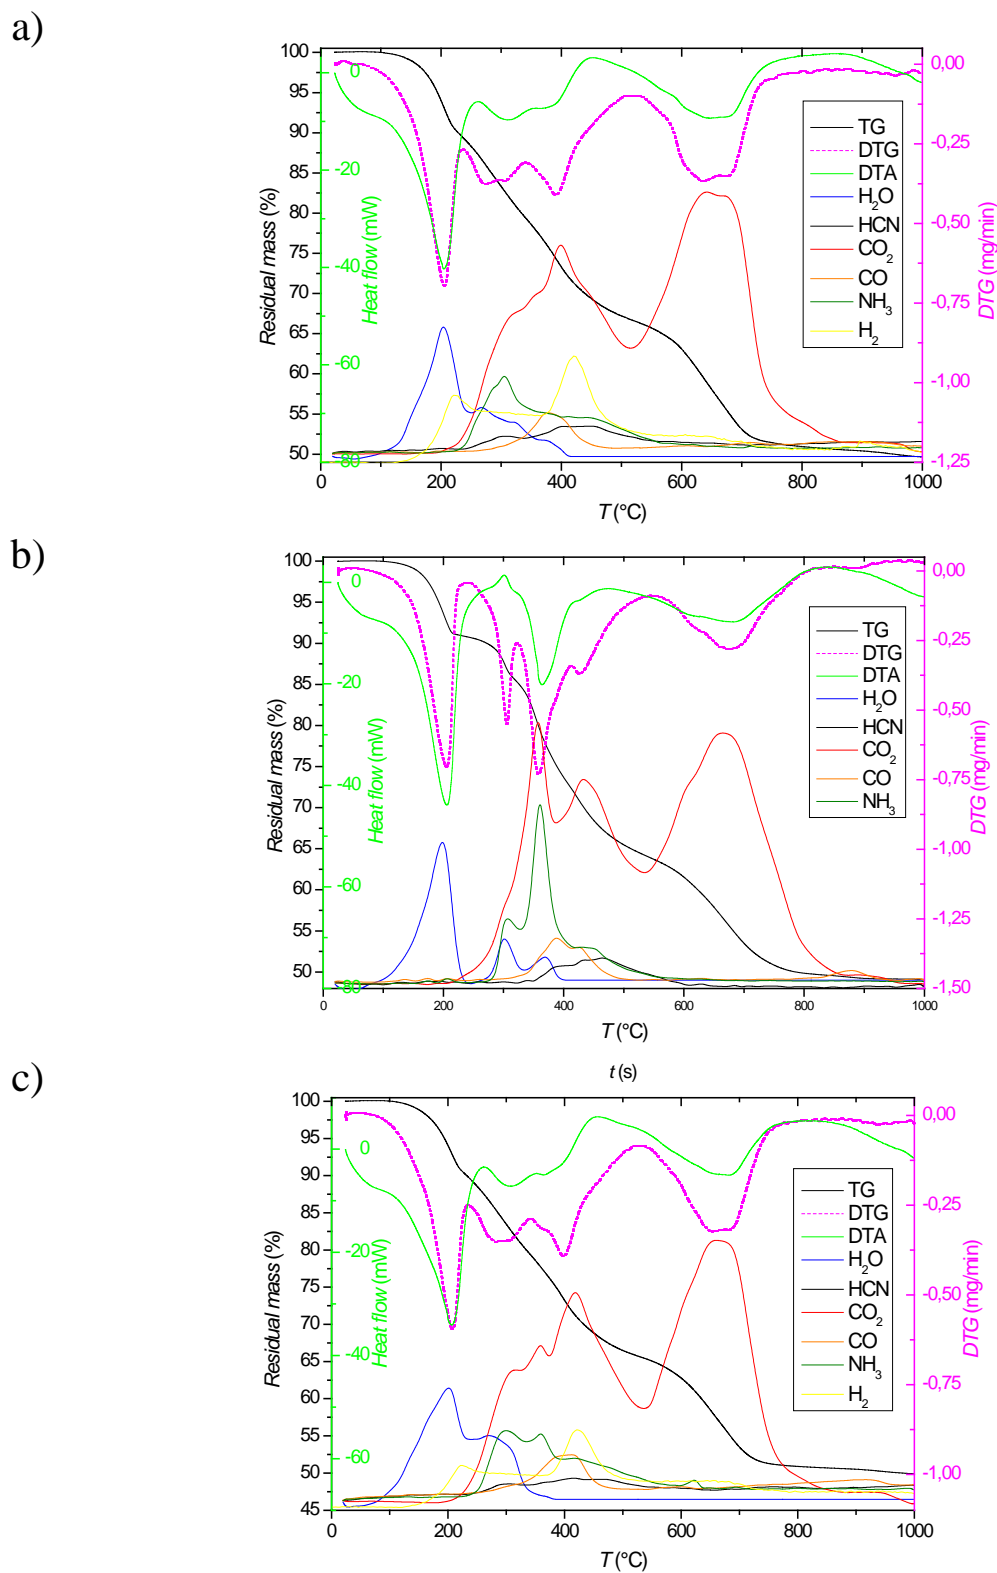

**Figure S4.** Thermal decomposition of the  $\text{N}_2\text{H}_5[\text{Ln}_2(\text{C}_2\text{O}_4)_4(\text{N}_2\text{H}_5)].4\text{H}_2\text{O}$  compounds, a) Ce-HyOx, b) Nd-HyOx, c) CeNd-HyOx, under streaming argon (250 mL/min) on heating at  $10^\circ\text{C}/\text{min}$  – TG, DTA and evolved gases recorded by FT-IR (except for the  $\text{H}_2$  signal recorded by MS), displayed with arbitrary units.

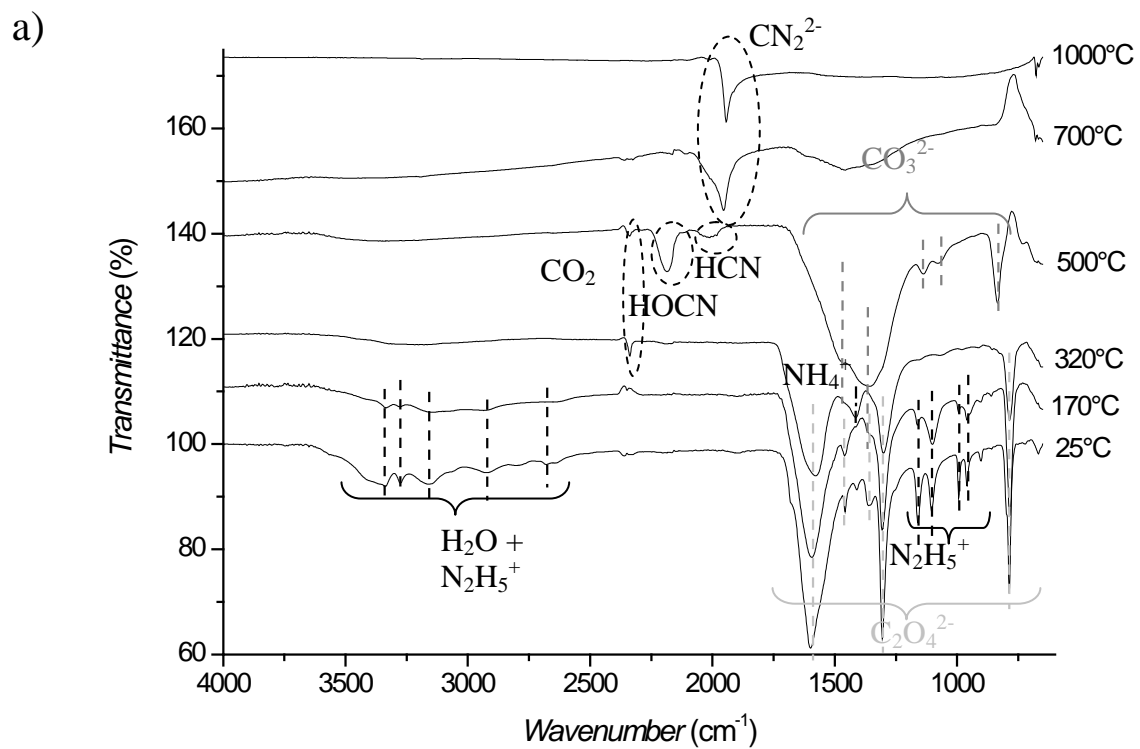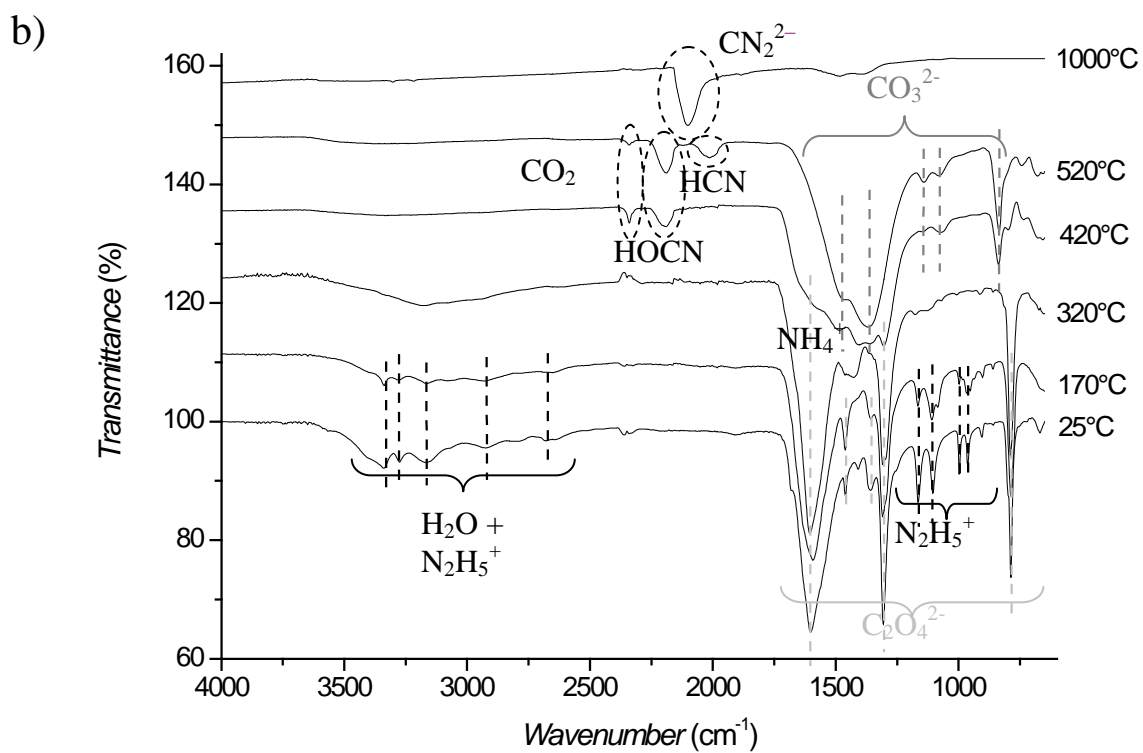

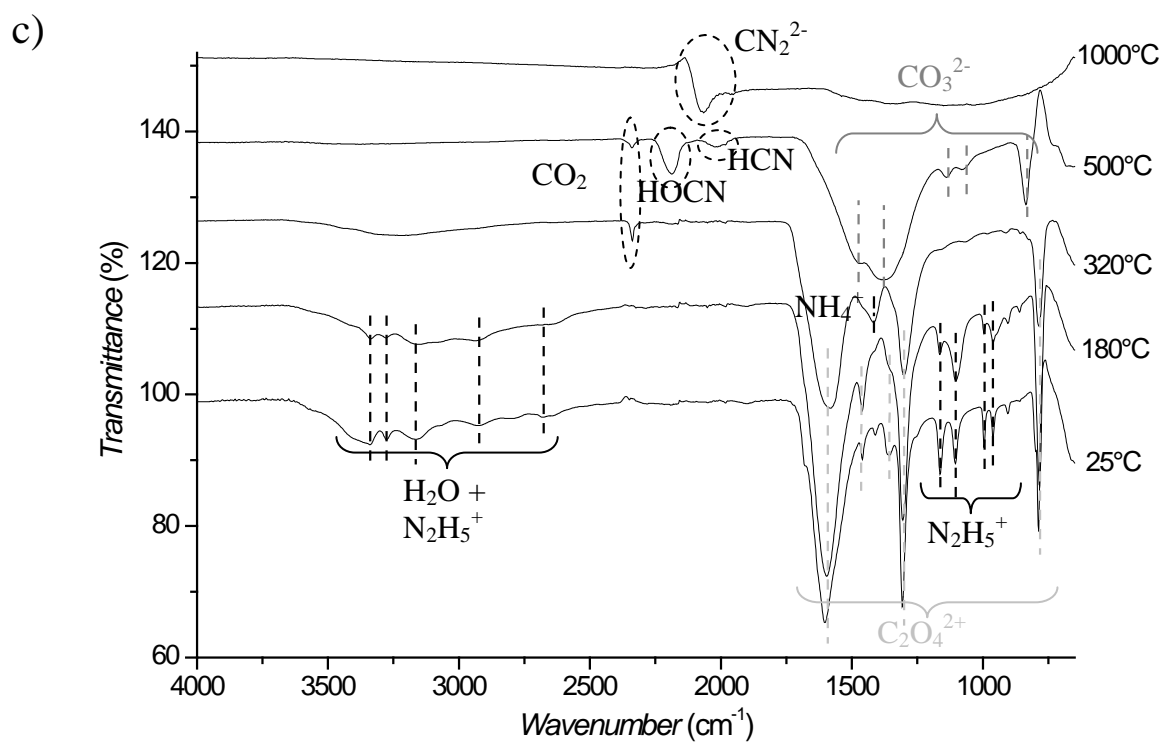

**Figure S5.** FT-IR spectra of thermal decomposition intermediates under argon flow for N<sub>2</sub>H<sub>5</sub>[Ln<sub>2</sub>(C<sub>2</sub>O<sub>4</sub>)<sub>4</sub>(N<sub>2</sub>H<sub>5</sub>)]·4H<sub>2</sub>O compounds, a) Ce-HyOx, b) Nd-HyOx and c) CeNdHyOx.



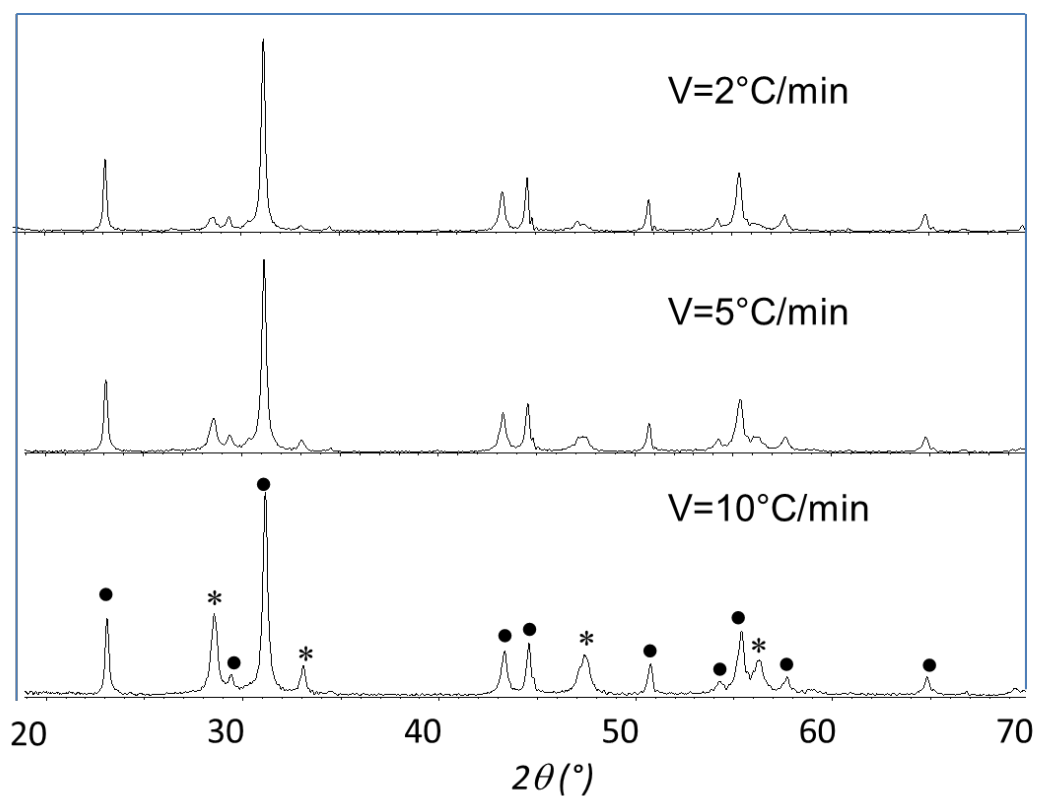

**Figure S6.** XRD patterns of the residues after calcination under argon at 1000°C, showing the presence of cubic  $\text{CeO}_2$  (\*, JCPDS 04-013-4361) and tetragonal  $\text{Ce}_2\text{O}_2\text{CN}_2$  (●, JCPDS 00-049-1163) for Ce-HyOx with an increase of the oxide/oxycyanamide ratio with an increase of the heating rate of the thermal analysis.

Table S1. Characteristics of the strongest hydrogen bonds

|                         |           |          |          |            |          |             |          |
|-------------------------|-----------|----------|----------|------------|----------|-------------|----------|
| N2 – Ow2                | 2.711(11) | N2 – H1  | 0.870(4) | H1 --- Ow2 | 1.867(8) | N2-H1---Ow2 | 165.2(4) |
| N2 – O7<br>(2x)         | 2.961(5)  | N2 – H2  | 0.870(3) | H2 --- O7  | 2.186(2) | N2-H2---O7  | 148.2(6) |
| Ow1 – O5                | 2.769(5)  | Ow1 – H1 | 0.83(6)  | H1 --- O5  | 1.95(6)  | Ow1-H1---O5 | 167(5)   |
| Ow1 – O8                | 2.761(5)  | Ow1 – H2 | 0.82(3)  | H1 --- O8  | 1.97(3)  | Ow1-H2---O8 | 161(3)   |
| Ow2 –<br>Ow3/N3<br>(2x) | 2.881(5)  | Ow2 – H1 | 0.81(4)  | H1 --- O/N | 2.116(4) | Ow2-H---O/N | 156(4)   |

Table S1. **Decomposition scheme of Ce-HyOx in air.**

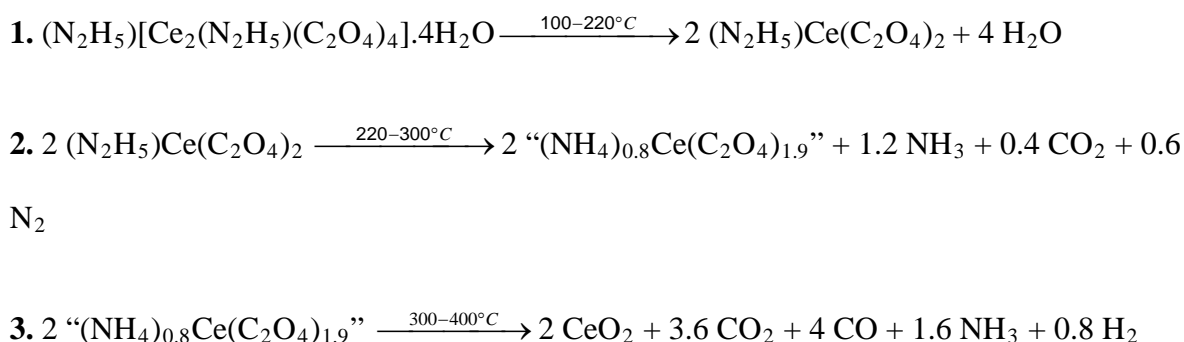

Table S2. **Decomposition scheme of Nd-HyOx in air.**

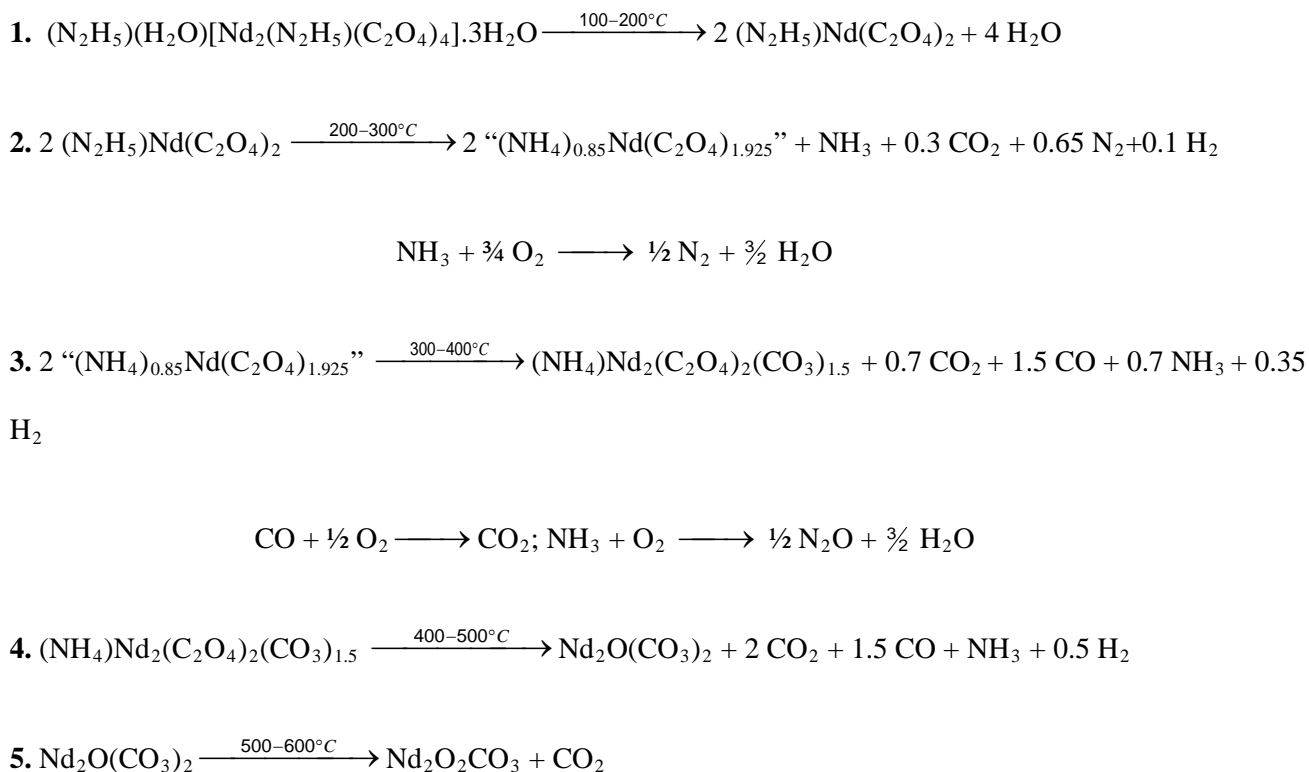

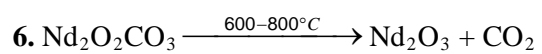

T

Table S3. Decomposition scheme of the Ln-HyOx compounds in air and in argon.

| Air                                                                                                   |                                                                              |                                                                              | Argon                                                                     |                                                                                     |                                                                                                  |
|-------------------------------------------------------------------------------------------------------|------------------------------------------------------------------------------|------------------------------------------------------------------------------|---------------------------------------------------------------------------|-------------------------------------------------------------------------------------|--------------------------------------------------------------------------------------------------|
| <i>Ce</i>                                                                                             | <i>Nd</i>                                                                    | <i>Ce-Nd</i>                                                                 | <i>Ce</i>                                                                 | <i>Nd</i>                                                                           | <i>Ce-Nd</i>                                                                                     |
| $\text{N}_2\text{H}_5[\text{Ln}_2(\text{C}_2\text{O}_4)_4(\text{N}_2\text{H}_5)].4\text{H}_2\text{O}$ |                                                                              |                                                                              |                                                                           |                                                                                     |                                                                                                  |
| 100-200 <sup>(1)</sup>                                                                                |                                                                              |                                                                              |                                                                           |                                                                                     |                                                                                                  |
| 9.4/9.3 <sup>(2)</sup><br>205±20 <sup>(3)</sup>                                                       | 9.3/9.2 <sup>(2)</sup><br>270±20 <sup>(3)</sup>                              | 9.7/9.3 <sup>(2)</sup><br>215±20 <sup>(3)</sup>                              | 9.8/9.3 <sup>(2)</sup><br>315±20 <sup>(3)</sup>                           | 9.3/9.2 <sup>(2)</sup><br>350±20 <sup>(3)</sup>                                     | 9.1/9.3 <sup>(2)</sup><br>330±20 <sup>(3)</sup>                                                  |
| $2 \text{N}_2\text{H}_5[\text{Ln}(\text{C}_2\text{O}_4)_2]$                                           |                                                                              |                                                                              |                                                                           |                                                                                     |                                                                                                  |
| 220-300 <sup>(1)</sup><br>6.6/7.1 <sup>(2)</sup><br>-35±5 <sup>(3)</sup>                              | 200-300 <sup>(1)</sup><br>6.3/6.2 <sup>(2)</sup><br>-20±5 <sup>(3)</sup>     | 200-280 <sup>(1)</sup><br>7.1/7.1 <sup>(2)</sup><br>-20±5 <sup>(3)</sup>     | 200-350 <sup>(1)</sup><br>11.9/11.9 <sup>(2)</sup><br>20±5 <sup>(3)</sup> | 200-300 <sup>(1)</sup><br>5.4/5.4 <sup>(2)</sup><br>-10±2 <sup>(3)</sup>            | 200-350 <sup>(1)</sup><br>12.1/11.9 <sup>(2)</sup><br>20±5 <sup>(3)</sup>                        |
| $(\text{NH}_4)_{1.6}\text{Ce}_2(\text{C}_2\text{O}_4)_{3.8}$                                          | $(\text{NH}_4)_{1.7}\text{Nd}_2(\text{C}_2\text{O}_4)_{3.85}$                | $(\text{NH}_4)_{1.6}\text{CeNd}(\text{C}_2\text{O}_4)_{3.8}$                 | $(\text{NH}_4)\text{Ce}_2(\text{C}_2\text{O}_4)_{3.5}$                    | $\text{NH}_4)_{1.8}\text{Nd}_2(\text{C}_2\text{O}_4)_{3.9}$                         | $(\text{NH}_4)\text{CeNd}(\text{C}_2\text{O}_4)_{3.5}$                                           |
|                                                                                                       | 200-400 <sup>(1)</sup><br>11.0/11.0 <sup>(2)</sup><br>56±5 <sup>(3)</sup>    | 280-320 <sup>(1)</sup><br>4.2/4.1 <sup>(2)</sup><br>-25±5 <sup>(3)</sup>     | 350-500 <sup>(1)</sup><br>12.0/* <sup>(2)</sup><br>20±5 <sup>(3)</sup>    | 300-400 <sup>(1)</sup><br>13.4/13.6 <sup>(2)</sup><br>125±10                        | 350-500 <sup>(1)</sup><br>12.1/* <sup>(2)</sup><br>25±5 <sup>(3)</sup>                           |
|                                                                                                       | $(\text{NH}_4)\text{Nd}_2(\text{C}_2\text{O}_4)_2(\text{CO}_3)_{1.5}$        | $(\text{NH}_4)_{1.4}\text{CeNd}(\text{C}_2\text{O}_4)_3(\text{CO}_3)_{0.7}$  |                                                                           | $(\text{NH}_4)\text{Nd}_2(\text{C}_2\text{O}_4)_{1.5}(\text{CO}_3)_2$               |                                                                                                  |
|                                                                                                       | 400-500 <sup>(1)</sup><br>18.8/19.0 <sup>(2)</sup><br>-860±30 <sup>(3)</sup> |                                                                              |                                                                           | 400-520 <sup>(1)</sup><br>7.3/* <sup>(2)</sup><br>≈0 <sup>(3)</sup>                 |                                                                                                  |
|                                                                                                       | $\text{Nd}_2\text{O}(\text{CO}_3)_2$                                         |                                                                              |                                                                           | Carbonate intermediate                                                              |                                                                                                  |
| 300-400 <sup>(1)</sup><br>38.1/38.8 <sup>(2)</sup><br>-1095±30 <sup>(3)</sup>                         | 500-600 <sup>(1)</sup><br>6.0/5.7 <sup>(2)</sup><br>-20±5 <sup>(3)</sup>     | 320-600 <sup>(1)</sup><br>34.2/35.5 <sup>(2)</sup><br>-770±30 <sup>(3)</sup> | 500-850 <sup>(1)</sup><br>18.2/* <sup>(2)</sup><br>260±20 <sup>(3)</sup>  | 520-900 <sup>(1)</sup><br>15.6/* <sup>(2)</sup><br>150±20 <sup>(3)</sup>            | 500-850 <sup>(1)</sup><br>16.2/* <sup>(2)</sup><br>170±20 <sup>(3)</sup>                         |
|                                                                                                       | $\text{Nd}_2\text{O}_2\text{CO}_3$                                           |                                                                              |                                                                           |                                                                                     |                                                                                                  |
|                                                                                                       | 600-800 <sup>(1)</sup><br>4.6/5.7 <sup>(2)</sup><br>30±5 <sup>(3)</sup>      |                                                                              |                                                                           |                                                                                     |                                                                                                  |
| 2 CeO <sub>2</sub>                                                                                    | A-Nd <sub>2</sub> O <sub>3</sub>                                             | CeNdO <sub>3.5</sub>                                                         | CeO <sub>2</sub> +<br>T-Ce <sub>2</sub> O <sub>2</sub> CN <sub>2</sub>    | A-Nd <sub>2</sub> O <sub>3</sub> + H-Nd <sub>2</sub> O <sub>2</sub> CN <sub>2</sub> | A-(Ce,Nd) <sub>2</sub> O <sub>3</sub> +<br>H-(Ce,Nd) <sub>2</sub> O <sub>2</sub> CN <sub>2</sub> |

Notes. <sup>(1)</sup>Transition temperature in °C. <sup>(2)</sup>Mass loss exp/calc. in %. <sup>(3)</sup>Reaction heat in kJ/mol.
